# Supplementary material
Source: publisher figshare collection journal article supplement (https://geolsoc.figshare.com/ndownloader/files/28222322)
Supplement: Supplementary file 1 [file 28222322]

## Sheet: Grossular-andradite garnet
Major element composition of zonal grossular-andradite from the groundmass of Poiskovaya pipe with inclusions of titanomagnetite, wt%.
№	1	1	2	2	3	3	4	4	5	Ti-mgt
	core	rim	core	rim	core	rim	core	rim	core	inclusion in grt
SiO2	38.1	29.6	38.2	31.7	38.8	34.5	37.8	29.4	38.4	0.1
TiO2	1.7	2.1	1.8	2	0.2	1.1	1.7	3	0.7	8.2
Al2O3	15	12	15.3	14.8	16.9	13.7	15.1	10.4	15.4	2.3
Cr2O3	0.1	0.1	0.1	0.1	0.1	0.1	0.1	0.1	0.1	0.5
Fe2O3	7.5	10.8	7.3	8	6.7	9.9	7.7	12.3	7.9	79
MgO	1.5	0.9	1.8	0.8	1.9	0.9	1.7	1	1.3	8.3
CaO	35.9	37.2	35.7	36.7	34.6	35.7	35.3	36.2	36.2	0.7
Сумма	99.7	92.7	100.1	94.1	99.2	95.9	99.4	92.4	99.9	99.1
Composition of grossular-andradite garnet from the groundmass of Zapolarnaya and Novinka pipes, wt%.
№	Zapolarnaya		Novinka
SiO2	33.2	32.6	31.6	30.1
TiO2	0.6	2.9	2.4	1.9
A2O3	0.4	6.3	1.8	1.1
Fe2O3	30.2	19	25.5	25.3
MnO	0.2	0.4	0.2	0.4
MgO	1.2	1.5	2.9	4.1
CaO	34.1	37.2	35.5	36.9
Сумма	99.9	99.9	99.9	99.8
Pyr	4.5	5.2	10.3	13.2

## Sheet: Perovskite+NNO
Composition of groundmass perovskite from the Upper Muna field, wt%.
	№	M5-25	122/352im52-5c	122/352im52-6c	105-174 im34 2	105-174 prvs	105-174 im34 4	105-174 im26-3	118-509 im37 5	118-509 im35 1	118-509 im43 3	118-509 im35 2	114-388 im21 1	114-388 im12-1c	114-388 im12-2	114-388 im21ver 1	122/352im52-5r	122/352im52-6r	105-174 im26-3r	m5-7r1	m-8-2	m8-1c	m-4-19	m8-5	m8-2а	m8-10	409/145im43-6	409/145im46-1c	409/145im46-2c	m-4-10	m-4-13	m-4-11с	Kos_m4_/4_1 prvs 60*40	409/145im46-1r	409/145im46-2r	M8-1r	m8-6-2	m-4-1c	m-4-1a	m-4-11r	m-4-14r	m-4-15	Kos_m4_/2_1 prvs 20*20	Kos_m4_/2_2 prvs 10*30	8d/119im34-3	8d/119im34-4	M2-2c	M2-1	M2-9c
	Pipe	Zapolarnaya	Zapolarnaya	Zapolarnaya	Zapolarnaya CK	Zapolarnaya CK	Zapolarnaya CK	Zapolarnaya CK	Zapolarnaya PK	Zapolarnaya PK	Zapolarnaya PK	Zapolarnaya PK	Zapolarnaya PK	Zapolarnaya PK	Zapolarnaya PK	Zapolarnaya PK	Zapolarnaya	Zapolarnaya	Zapolarnaya CK	Zapolarnaya	Novinka	Novinka	Novinka	Novinka	Novinka	Novinka	Novinka	Novinka	Novinka	Novinka carb	Novinka carb	Novinka carb	Novinka carb	Novinka	Novinka	Novinka	Novinka	Novinka carb	Novinka carb	Novinka carb	Novinka carb	Novinka carb	Deimos 8d/119	Deimos 8d/119	Deimos 8d/119	Deimos 8d/119	Deimos 8d/119	Deimos 8d/119	Deimos 8d/119
Element	Site	prv core	prv core	prv core	prv core	prv core	prv core	prv core	prv core	prv core	prv core	prv core	prv core	prv core	prv core	prv core	prv rim	prv rim	prv rim	sp rim	prv core	prv core 50х10	prv 40х60	prv core 25х25	prv 60х80	prvs 50х50	prvs	prvs	prvs	prv core 40х70	prv 30х70	prv core 30х50	prv core	prvs	prvs	prv	ilm rim 10х10	sp rim	sp rim	prv rim 30х50	prv rim 10х10	prv rim 10х60	prv core	prv core	prvs	prvs	prv 26х18	prv core 20х18	prv core
Mg	MgO	0.07	0.108	0.128	0.035	0.136	0.063	0.056	0.04	0.05	0.027	0.037	0.016	0.053	0.027	0.043	0.111	0.102	0.049	0.08	0.01	0	0	0.37	0	0.4	0.382	0.097	0.112	0	0	0.07	0.077	0.065	0.098	0	0.03	2.07	0	0.09	0	0	0.116	0.149	0.126	0.123	0.51	0.08	0.05
Al	Al2O3	0.39	0.471	0.45	0.198	0.173	0.159	0.125	0.191	0.132	0.138	0.138	0.158	0.098	0.114	0.039	0.489	0.489	0.162	0.4	0.24	0	0	0.1	0.08	0.07	0.141	0.143	0.112	0	0.14	0.1	0.157	0.164	0.192	0.06	0.15	0	0.03	0.12	0.09	0.2	0.465	0.409	0.482	0.232	0.03	0.42	0.6
Si	SiO2	0.7	0	0.016	0.009	0.039	0.022	0	0.088	0	0	0.053	0.061	0	0.037	0	0.09	0.078	0	0.68	0.83	0.54	0	0.89	0.33	0.57	0.284	0.05	0.077	0.69	0	0.72	0.029	0.004	0.023	0.42	0.37	4.06	0.05	0.61	0	0	0.037	0.059	0.043	0.115	1.56	0.62	0.5
Ca	CaO	34.7	36.549	36.984	38.648	38.406	38.187	37.637	40.48	39.619	39.424	39.31	37.98	36.913	36.633	35.84	36.447	37.233	37.754	35.52	37.28	35.33	34.4	34.8	36.51	35.79	37.266	37.938	38.25	34.01	33.7	35.88	35.677	38.848	38.884	37.2	37.33	32.56	35.06	36.35	34.21	34.99	36.39	35.431	36.359	38.604	35.87	33.77	33.97
K	K2O		0.031	0.021													0.024	0.009									0.03	0.022	0.034					0.034	0.039										0.059	0.032
Ti	TiO2	51.53	52.284	53.342	55.638	54.919	56.236	55.44	55.72	55.354	56.524	56.616	54.771	55.539	55.154	54.129	52.788	53.541	55.368	52.68	54.66	54.84	54.89	52.56	55.27	54.08	54.04	55.49	55.252	53.7	55	55.31	54.92	56.148	55.441	55.49	55.73	47.84	55.81	55.25	55.14	55.72	54.04	54.764	52.951	54.816	55.52	53.67	53.91
Cr(III)	Cr2O3	0.12																		0.03	0.07	0.22	0	0.14	0.36	0.19				0	0.08	0				0.27	0.21	0.14	0	0	0.27	0					0	0	0
Mn(II)	MnO	0	0.021	0	0.022	0.023	0.035	0.009	0.007	0.051	0.045	0.023	0.037	0.034	0.037	0.001	0	0.01	0.03	0	0	0	1.14	1.48	0	0	0.02	0.024	0	0	0	0	0.237	0.022	0.041	0	0	0	0	0	0	0	0.212	0.265	0.025	0.027	0	0	0
Fe(III)	Fe2O3	1.54	1.683	1.593	1.302	1.145	1.256	0.966	1.163	0.934	1.027	0.954	1.091	1.045	1.233	0.967	1.714	1.597	1.07	1.75	1.61	0.93	0	0.06	1.03	1.04	1.108	1.047	0.966	1.15	1.3	1.36	1.215	0.999	0.984	1.36	1.13	3.12	1.89	1.16	1.82	1.19	1.734	2.089	1.837	1.236	1.31	1.79	1.73
Sr	SrO	0.17	0	0													0	0.058		0	0	0	0	0	0	0	0.024	0	0	0	0	0	0.22	0	0	0	0	0	0	0	0	0	0.276	0.281	0	0	0	0	0
Nb	Nb2O5	0	0.556	0.617	0.433	0.41	0.424	0.519	0.552	0.529	0.325	0.503	0.667	0.657	0.678	1.122	0.602	0.55	0.446	1.19	0.7	0	0.92	0.98	0	0.72	0.439	0.353	0.354	3.15	0.74	1.51	0.506	0.423	0.323	0	0.57	0	1.03	1.24	1.04	0.81	0.961	0.858	0.531	0.477	0.67	1.12	1.4
BaO	BaO		0.553	0.316													0.4	0.509									0.028	0.03	0.098					0.077	0.011										0.082	0.092
La	La2O3	1.62	1.029	1.114	0.453	0.713	0.5	0.619	0.451	0.618	0.702	0.382	0.922	0.751	0.689	1.012	1.098	1.237	0.348	0.22	0.21	0	2.09	0.58	0	0.83	0.716	0.683	0.689	1.93	1.63	1.94	0.88	0.603	0.649	0	0	1.18	1.64	1.58	2.07	2.17	1.2	1.172	1.077	0.731	0.41	1.33	1.3
Ce(III)	Ce2O3	2.79	2.963	2.699	0.7	1.099	0.906	1.521	0.888	1.027	0.98	0.955	1.553	1.84	1.964	3.039	3.072	2.62	1.367	1.96	0.23	1.87	2.4	2.01	1.11	1.37	1.857	2.069	1.893	2.3	2.32	1.74	2.211	1.499	1.243	0.92	0.87	0.03	2.02	1.24	1.81	2.03	2.084	2.156	2.851	1.73	0.2	3.01	3.28
Pr	Pr2O3																																0.249										0.25	0.278
Nd	Nd2O3		0.028	0													0	0.551									0	0	0.523				1.136	0.825	0								0.859	0.964	0.711	0.165
Ta	Ta2O5	0.94	0.28	0.215													0.226	0.113		0.73	1.03	0.7	1	0.83	0.68	1.2	0.084	0.134	0.137	0.62	0.81	0.78		0.112	0.051	0.82	0.41	0.47	0.6	0.77	0.9	0.85			0.239	0.071	0.2	0.84	1.23
Th	ThO2	0.05	0.933	0.529													0.795	0.236		0	0	0.41	0.76	0.58	0	0	0.451	0.483	0.261	0.12	0.83	0		0.211	0	0	0	0	0.08	0	0.26	0			0.687	0.204	0	0.67	0.35
U(VI)	UO3	0																		0	0	0	0	0	0	0				0	0	0				0	0	0	0	0	0	0					0.1	0.42	0
Total		94.62	97.4983	98.1868	98.468	98.513	99.187	98.411	100.579	99.49	100.485	100.266	99.052	98.503	98.426	99.105	97.882	98.933	98.13	95.3	97.16	95.01	97.88	95.68	95.64	96.58	96.9369	98.6188	98.8029	97.67	96.86	99.41	98.189	100.149	98.064	96.67	96.87	91.74	98.21	98.41	97.77	98.24	99.001	99.316	98.085	98.666	96.38	97.91	98.68
No Oxyg		3	3	3	3	3	3	3	3	3	3	3	3	3	3	3	3	3	3	3	3	3	3	3	3	3	3	3	3	3	3	3	3	3	3	3	3	3	3	3	3	3	3	3	3	3	3	3	3
Formula A B O3
A cations		0.95693	0.989699	0.980944	0.991102	0.998863	0.976823	0.990756	1.01603	1.0157	0.999365	0.995645	1.00374	0.97817	0.97965	0.992399	0.980802	0.98809	0.991241	0.935677	0.939354	0.930569	0.927543	0.929036	0.941863	0.932224	0.976251	0.979663	0.988602	0.903219	0.907489	0.924147	0.977857	0.985592	0.992738	0.947296	0.945923	0.86245	0.91626	0.933944	0.905928	0.922139	0.97581	0.952217	0.97695	0.991708	0.901248	0.903365	0.902012
Ca		0.914425	0.943957	0.940513	0.962849	0.961902	0.945748	0.944498	0.991293	0.982632	0.966427	0.963539	0.951252	0.926666	0.922067	0.907633	0.934911	0.94311	0.948018	0.916377	0.935554	0.911821	0.883796	0.902841	0.932163	0.913024	0.948969	0.951445	0.959088	0.86567	0.868049	0.892747	0.905244	0.958934	0.973854	0.939396	0.938423	0.85155	0.884232	0.909744	0.870722	0.885639	0.91725	0.889271	0.930789	0.96728	0.896048	0.861833	0.86043
Sr		0.00242446	0	0	0	0	0	0	0	0	0	0.00110101	0.000108437	0	0	0	0	0.000795077	0	0	0	0	0	0	0	0	0.000330748	0	0	0	0	0	0.00302097	0	0	0	0	0	0	0	0	0	0.00376497	0.00381684	0	0	0	0	0
Th		0.000279841	0.00511777	0.00285712	0	0	0	0	0	0	0	0	0	0	0	0	0.0043311	0.0012696	0	0	0	0.00224736	0.00414696	0.00319582	0	0	0.00243915	0.00257264	0.00138992	0.000648708	0.00454062	0	0	0.00110618	0	0	0	0	0.000428515	0	0.00140547	0	0	0	0.00373524	0.00108561	0	0.00363153	0.00188283
Ba			0.00522364	0.00293906	0.0014761	0.00104426	0.00173007	0.00156947	0.00149571	0.00146951	0.00135381	0.00189156	0.000787789	0	0	0.00121335	0.00375266	0.00471545	0.00114798								0.000260776	0.00027517	0.000898719					0.000695155	0.00010076										0.000767758	0.000843099
REE+Y		0.0398	0.0354	0.0333	0.0119	0.0201	0.0159	0.0233	0.0138	0.0171	0.0177	0.0139	0.0278	0.0282	0.0303	0.0457	0.0366	0.0382	0.0199	0.0193	0.0038	0.0165	0.0396	0.023	0.0097	0.0192	0.0225	0.0236	0.0265	0.0369	0.0349	0.0314	0.0386	0.0245	0.0162	0.0079	0.0075	0.0109	0.0316	0.0242	0.0338	0.0365	0.0376	0.0391	0.0405	0.0225	0.0052	0.0379	0.0397
Na		0	0	0.00133451	0.0148771	0.0158172	0.0134448	0.0213885	0.00943876	0.0144965	0.0138844	0.0152137	0.0237943	0.0233042	0.0272829	0.0378526	0.00120686	0	0.0221742	0	0	0	0	0	0	0	0.00175104	0.0017699	0.000725973	0	0	0	0.0309924	0.000357342	0.00258328	0	0	0	0	0	0	0	0.0171957	0.0200292	0.00115812	0	0	0	0
			0.000953287	0.000635852													0.000733002	0.000271433									0.000909591	0.000656927	0.00101506					0.000999273	0.00116298										0.00179836	0.000954674
B cations		1.06148	1.03965	1.03972	1.02524	1.02935	1.03583	1.03353	1.0116	1.01504	1.02423	1.02243	1.03145	1.04436	1.04678	1.0532	1.04614	1.04472	1.03196	1.0546	1.03894	1.05009	1.07134	1.0706	1.04213	1.05753	1.03844	1.03273	1.02968	1.07141	1.0741	1.06411	1.05665	1.02729	1.02225	1.03864	1.03804	1.12884	1.0702	1.05416	1.07741	1.06949	1.05699	1.07325	1.0522	1.02805	1.06574	1.08187	1.08485
Mg		0.00256656	0.00388093	0.00452894	0.00121321	0.00473921	0.00217088	0.00195528	0.00136288	0.00172541	0.000920889	0.00126184	0.000557566	0.00185121	0.00094556	0.00151512	0.00396157	0.00359476	0.00171193	0.00287162	0.000349163	0	0	0.0133558	0	0.0141976	0.0135344	0.00338467	0.00390733	0	0	0.00242331	0.00271834	0.00223238	0.00341495	0	0.00104929	0.0753237	0	0.00313395	0	0	0.00406817	0.00520322	0.00448792	0.00428805	0.0177258	0.00284065	0.00176208
Si		0.0172165	0	0.00037975	0.000209267	0.00091164	0.000508522	0	0.00201127	0	0	0.00121246	0.00142593	0	0.000869198	0	0.00215466	0.00184398	0	0.0163733	0.0194401	0.0130073	0	0.0215501	0.00786359	0.0135713	0.0067497	0.00117032	0.00180196	0.0163916	0	0.01672	0.000686755	9.21524e-05	0.000537623	0.00989878	0.00868099	0.0991011	0.00117693	0.0142486	0	0	0.00087043	0.00138207	0.00102739	0.00268933	0.0363707	0.0147676	0.01182
Ti		0.953467	0.94814	0.952462	0.973262	0.965787	0.977915	0.976869	0.958075	0.96397	0.9729	0.974389	0.963204	0.978969	0.974752	0.962497	0.95076	0.952243	0.976202	0.954276	0.96314	0.993781	0.99018	0.957446	0.990824	0.968689	0.966233	0.977127	0.972751	0.959726	0.994727	0.966288	0.978441	0.973153	0.974947	0.983892	0.983686	0.878504	0.98831	0.970899	0.985418	0.990263	0.956418	0.965101	0.951789	0.964393	0.973815	0.961724	0.958774
Mn(II)		0	0.000428752	0	0.000433275	0.000455375	0.000685232	0.000178541	0.000135509	0.000999925	0.000872029	0.00044566	0.000732575	0.000674734	0.00073621	2.00195e-05	0	0.000200237	0.000595504	0	0	0	0.0231531	0.0303531	0	0	0.000402605	0.000475806	0	0	0	0	0.00475374	0.000429292	0.00081174	0	0	0	0	0	0	0	0.00422427	0.00525783	0.000505929	0.000534802	0	0	0
U(VI)		0	0	0	0	0	0	0	0	0	0	0	0	0	0	0	0	0	0	0	0	0	0	0	0	0	0	0	0	0	0	0	0	0	0	0	0	0	0	0	0	0	0	0	0	0	0.000489757	0.00210146	0
Hf		0	0	0	0	0	0	0	0	0	0	0	0	0	0	0	0	0	0	0.000412393	0.00193888	0.00116889	0.00191651	0.00207354	0.00183655	0.00217485	0	0	0	0	0.00212733	0	0	0	0	0.000874597	0.000468811	0.00188126	0	0	0.00108494	0.00188812	0	0	0	0	0	0.00115585	0.0024293
Nb		0	0.00605897	0.00662038	0.00455162	0.00433274	0.0044307	0.00549541	0.00570358	0.00553592	0.00336154	0.00520213	0.00704877	0.00695915	0.00720057	0.011989	0.00651556	0.00587819	0.00472537	0.0129537	0.00741204	0	0.00997306	0.0107277	0	0.00774997	0.00471684	0.00373535	0.00374522	0.0338301	0.00804253	0.0158526	0.0054172	0.00440562	0.00341329	0	0.00604592	0	0.0109607	0.0130943	0.0111688	0.00865057	0.0102206	0.00908626	0.00573563	0.00504295	0.0070619	0.0120603	0.0149622
Ta		0.00628706	0.00183542	0.00138768	0	0	0	0	0	0	0	0	0	0	0	0	0.00147136	0.000726463	0	0.00477997	0.00656041	0.00458527	0.00652071	0.00546526	0.00440646	0.00776968	0.0005429	0.000852933	0.000871863	0.00400533	0.00529542	0.00492574	0	0.00070168	0.000324186	0.00525558	0.00261593	0.00311978	0.00384066	0.0048911	0.00581393	0.0054605	0	0	0.00155288	0.000451522	0.00126803	0.00544092	0.00790726
Ce(III)		0.0251	0.0261	0.0235	0.006	0.0094	0.0077	0.013	0.0074	0.0087	0.0082	0.008	0.0133	0.0158	0.0169	0.0263	0.0269	0.0227	0.0117	0.0173	0.002	0.0165	0.0211	0.0178	0.0097	0.0119	0.0162	0.0177	0.0162	0.02	0.0204	0.0148	0.0192	0.0126	0.0106	0.0079	0.0075	0.0003	0.0174	0.0106	0.0157	0.0176	0.0179	0.0185	0.0249	0.0148	0.0017	0.0262	0.0284
La		0.0147	0.0091	0.0098	0.0039	0.0061	0.0043	0.0053	0.0038	0.0053	0.0059	0.0032	0.0079	0.0065	0.006	0.0088	0.0097	0.0108	0.003	0.002	0.0018	0	0.0185	0.0052	0	0.0073	0.0063	0.0059	0.0059	0.0169	0.0145	0.0166	0.0077	0.0051	0.0056	0	0	0.0106	0.0142	0.0136	0.0181	0.0189	0.0104	0.0101	0.0095	0.0063	0.0035	0.0117	0.0113
Pr		0	0	0	0	0	0	0	0	0	0	0	0	0	0	0	0	0	0	0	0	0	0	0	0	0	0	0	0	0	0	0	0.0021	0	0	0	0	0	0	0	0	0	0.0021	0.0024	0	0	0	0	0
Nd		0	0.0002	0	0.002	0.0046	0.0039	0.005	0.0026	0.0031	0.0036	0.0027	0.0066	0.0059	0.0074	0.0106	0	0.0047	0.0052	0	0	0	0	0	0	0	0	0	0.0044	0	0	0	0.0096	0.0068	0	0	0	0	0	0	0	0	0.0072	0.0081	0.0061	0.0014	0	0	0
Al		0.0113049	0.0133807	0.0125877	0.00542599	0.00476607	0.00433151	0.00345047	0.0051449	0.00360117	0.00372109	0.00372073	0.00435292	0.00270615	0.00315629	0.0010864	0.0137975	0.0136247	0.00447457	0.0113512	0.00662501	0	0	0.00285374	0.00224674	0.00196427	0.00394949	0.00394483	0.00308907	0	0.00396666	0.0027369	0.00438187	0.00445294	0.00528941	0.00166663	0.00414777	0	0.000832258	0.00330353	0.00251972	0.00556833	0.0128926	0.0112916	0.0135728	0.00639426	0.000824335	0.0117903	0.0167168
Cr(III)		0.00233347	0	0	0.00545996	0.00811331	0.00804108	0.00525904	0.00536685	0.00583821	0.00707273	0.00587829	0.00713394	0.00657618	0.00702075	0.0131932	0	0	0.00548463	0.000571116	0.00129626	0.00418977	0	0.00268017	0.00678241	0.00357665	0	0	0	0	0.00152057	0	0	0	0	0.00503119	0.00389549	0.00270181	0	0	0.00507098	0	0	0	0	0	0	0	0
Fe(III)		0.0285026	0.0305285	0.0284519	0.0227818	0.0201411	0.0218471	0.0170258	0.0200026	0.0162697	0.0176817	0.0164233	0.0191916	0.0184249	0.0217971	0.0171994	0.0308791	0.0284108	0.0188705	0.0317091	0.0283768	0.0168575	0	0.00109327	0.0184698	0.0186337	0.0198164	0.0184417	0.0170117	0.0205584	0.0235181	0.0237662	0.021652	0.0173193	0.0173087	0.0241207	0.019951	0.0573093	0.0334781	0.02039	0.0325344	0.0211546	0.0306973	0.0368243	0.0330289	0.0217512	0.0229835	0.0320841	0.0307759
Total cations		2.01841	2.02935	2.02066	2.01634	2.02821	2.01265	2.02429	2.02763	2.03074	2.0236	2.01808	2.03519	2.02253	2.02643	2.0456	2.02694	2.03281	2.0232	1.99027	1.97829	1.98066	1.99889	1.99963	1.98399	1.98975	2.0147	2.0124	2.01828	1.97463	1.98159	1.98826	2.03451	2.01288	2.01499	1.98593	1.98396	1.99129	1.98646	1.9881	1.98334	1.99162	2.0328	2.02546	2.02915	2.01975	1.96699	1.98523	1.98686
unassigned cations		0.0322908	0.0085732	0.00987686	0.022809	0.0252036	0.0216436	0.0106931	0.0328133	0.0289993	0.0194457	0.0185493	0.0222831	0.0190636	0.018465	0.00756549	0.0103605	0.00723753	0.0182007	0.0505806	0.0485185	0.0501438	0.0468819	0.0551323	0.0458815	0.0538277	0.0176169	0.0127019	0.00536752	0.0667435	0.0619145	0.0554745	0.0201324	0.00709118	0.00633193	0.0421649	0.0428274	0.129015	0.0618992	0.048882	0.0684178	0.056715	0.021781	0.0412705	0.0135917	0.00826556	0.081678	0.068748	0.0705962
∆NNO	∆NNO	-0.37435	-0.625238	-1.21456	-2.37351	-3.00633	-2.59205	-3.93047	-3.2123	-4.12457	-3.49977	-4.04445	-3.58321	-3.76367	-2.9508	-4.69877	-0.594675	-1.13206	-3.37305	-1.19194	-1.3323	-3.28562	-8.74663	-8.56764	-2.88255	-3.81032	-3.13551	-3.35649	-3.71521	-6.58917	-2.62579	-3.54002	-2.76414	-3.72088	-3.5995	-1.46983	-3.268	6.82733	-0.50056	-4.03929	-0.762497	-3.29267	-1.10326	0.570288	0.0402604	-2.69257	-2.63686	-0.986504	-1.67629
Normalized End-members (15)	Sequence and Formula per 1 B
lueshite	NaNbO3	0	0.000961389	0.00199559	0.00464767	0.00442675	0.00453633	0.00555193	0.00585641	0.00566277	0.00341811	0.00528929	0.00718272	0.00711466	0.00735037	0.0120812	0.00196161	0.000273598	0.00480482	0	0	0	0	0	0	0	0.00271262	0.00246784	0.00175993	0	0	0	0.0055398	0.00137276	0.00376028	0	0	0	0	0	0	0	0.0104726	0.00954268	0.00300258	0.000961811	0	0	0
loparite	Na0.5REE0.5TiO3	0	0	0	0.0210868	0.0234674	0.018458	0.0321131	0.00767052	0.0183318	0.0213998	0.0203586	0.0341276	0.0334207	0.0410003	0.052125	0	0	0.0354844	0	0	0	0	0	0	0	0	0	0	0	0	0	0.052308	0	1.76922e-05	0	0	0	0	0	0	0	0.0142943	0.0229852	0	0	0	0	0
REEFeO3	REEFeO3	0.041573	0.0358401	0.0336297	0.0015517	0.00883018	0.00694055	0.00753332	0.0103967	0.00828004	0.00730943	0.00399661	0.0113089	0.0120917	0.0103992	0.0199596	0.0370319	0.0384185	0.00257873	0.0205555	0.00403088	0.0176356	0	0.00712265	0.0102816	0.0206283	0.0228728	0.0227649	0.020319	0.022919	0.0316743	0.0287545	0.0133314	0.0220314	0.0163229	0.00837972	0.00790052	0.0126286	0.0344881	0.025376	0.0372193	0.0291343	0.0315042	0.0295224	0.0411281	0.022663	0.0058091	0.0415838	0.0437628
barioperovskite	BaTiO3	0	0.00526803	0.00297669	0.00150725	0.00106692	0.00177132	0.00158561	0.00153579	0.00150318	0.00137659	0.00192325	0.00080276	0	0	0.00122267	0.00379474	0.00475307	0.00116728	0	0	0	0	0	0	0	0.000265872	0.000279821	0.000908472	0	0	0	0	0.000703429	0.000101375	0	0	0	0	0	0	0	0	0	0.000779729	0.000849402	0	0	0
tausonite	SrTiO3	0.00253131	0	0	0	0	0	0	0	0	0	0.00111946	0.000110498	0	0	0	0	0.00080142	0	0	0	0	0	0	0	0	0.000337211	0	0	0	0	0	0.00308934	0	0	0	0	0	0	0	0	0	0.00385782	0.00400857	0	0	0	0	0
REE2Ti2O7	REETiO3.5	0	0	0	0	0	0	0	0	0	0	0	0	0	0	0	0	0	0	0	0	0	0.0214935	0.00879747	0	0	0	0.000630405	0.00325291	0.00911704	0.00320339	0.00266159	0	0.0014079	0	0	0	0	0	0.000279924	0	0.00531009	0	0	0	0	0	0	0
lakargiite	CaZrO3	0	0	0	0	0	0	0	0	0	0	0	0	0	0	0	0	0	0	0.000440775	0.00206408	0.00125002	0.0020829	0.00222856	0.00194995	0.00233289	0	0	0	0	0.00232308	0	0	0	0	0.000923219	0.000495626	0.00218132	0	0	0.00119195	0.0020585	0	0	0	0	0	0.00126711	0.00267637
megawite	CaSnO3	0	0	0	0	0	0	0	0	0	0	0	0	0	0	0	0	0	0	0	0	0	0	0	0	0	0	0	0	0	0	0	0	0	0	0	0	0	0	0	0	0	0	0	0	0	0	0	0
macedonite	PbTiO3	0	0	0	0	0	0	0	0	0	0	0	0	0	0	0	0	0	0	0	0	0	0	0	0	0	0	0	0	0	0	0	0	0	0	0	0	0	0	0	0	0	0	0	0	0	0	0	0
vapnikite	Ca1.5U0.5O3	0	0	0	0	0	0	0	0	0	0	0	0	0	0	0	0	0	0	0	0	0	0	0	0	0	0	0	0	0	0	0	0	0	0	0	0	0	0	0	0	0	0	0	0	0	0.00108739	0.00460751	0
perovskite	CaTiO3	0.954727	0.95093	0.952553	0.971207	0.962209	0.968294	0.953216	0.974541	0.966222	0.966496	0.967313	0.946468	0.947373	0.94125	0.914612	0.945395	0.950634	0.955965	0.979004	0.993905	0.973856	0.958447	0.968112	0.987768	0.977039	0.967513	0.967526	0.969496	0.965071	0.9456	0.968584	0.925732	0.970348	0.979798	0.990697	0.991604	0.98519	0.963644	0.974344	0.955412	0.963497	0.939871	0.933941	0.945303	0.970753	0.993104	0.936617	0.945264
ThNb4O12	Th0.25NbO3	0.0011687	0.00700009	0.00611499	0	0	0	0	0	0	0	0	0	0	0	0	0.00611487	0.00511894	0	0	0	0.00490351	0.0179258	0.013739	0	0	0.00264989	0.00219799	0.00290726	0.00289279	0.0145653	0	0	0.00379533	0	0	0	0	0.001868	0	0.00617639	0	0	0	0.00439958	0.00437489	0	0.0159244	0.00829728
latrappite	CaNb0.5Fe0.5O3	0	0	0	0	0	0	0	0	0	0	0	0	0	0	0	0	0	0	0	0	0	0	0	0	0	0	0	0	0	0	0	0	0	0	0	0	0	0	0	0	0	0	0	0	0.000397707	0	0	0
Ca2Nb2O7	CaNbO3.5	0	0	0	0	0	0	0	0	0	0	0	0	0	0	0	0	0	0	0	0	0	0	0	0	0	0	0	0	0	0	0	0	0	0	0	0	0	0	0	0	0	0	0	0	0	0	0	0
ThTi2O6	Th0.5TiO3	0	0	0.0027299	0	0	0	0	0	0	0	0	0	0	0	0	0.0057019	0	0	0	0	0.00235492	5.11172e-05	0	0	0	0.00364868	0.00413325	0.00135638	0	0.00263422	0	0	0.000341023	0	0	0	0	0	0	0	0	0	0	0.00538718	0	0	0	0
[truncated: 199 more columns]

## Sheet: Monticellite 
Composition of groundmass monticellite from the Upper Muna field, wt%.
№	Kos_M_04/3_7c mont	Kos_M_04/3_8c mont	Kos_M_04/3_8c mont	Kos_M_04/3_9c mont	Kos_M_04/3_10c mont	Kos_M_04/3_10c mont	Kos_M_04/3_11c mont	Kos_M_04/3_12c mont	Kos_M_04/3_13c mont	Kos_M_04/3_13c mont	M3-mont	M3-12	m3-2c	m3-2b	M3-2	M3-mont2	m3-8b	m3-8a	8d/257im26-5	Kos_M_04_4_9 mont	Kos_M_04_4_10 mont	Kos_M_04_4_11 mont	Kos_M_04_4_12 mont	Kos_M_04_4_13 mont	Kos_M_04_4_14 mont	Kos_M_04_4_15 mont	Kos_M_04_4_16 mont	Kos_M_04_4_17 mont	Kos_M_04_4_17 mont	Kos_M_04_4_17 mont	M4-4r	m-4-7	M4-4c	m-4-8	m-4-9	415/19im40-1	415/19im40-2	m-8-3	m8-3	409/145im43-7	409/145im46-4	Kos_m_2/8_7 mont	Kos_m_2/8_8 mont	m5-21	m5-4	m5-3	122/352im49-3	122/352im49-4	122/352im52-1
Sample	8d/257	8d/257	8d/257	8d/257	8d/257	8d/257	8d/257	8d/257	8d/257	8d/257	8d/257	8d/257	8d/257	8d/257	8d/257	8d/257	8d/257	8d/257	8d/257	415/19	415/19	415/19	415/19	415/19	415/19	415/19	415/19	415/19	415/19	415/19	415/19	415/19	415/19	415/19	415/19	415/19	415/19	409/145	409/145	409/145	409/145	409/145	409/145	122/352	122/352	122/352	122/352	122/352	122/352
Pipe	Deimos	Deimos	Deimos	Deimos	Deimos	Deimos	Deimos	Deimos	Deimos	Deimos	Deimos	Deimos	Deimos	Deimos	Deimos	Deimos	Deimos	Deimos	Deimos	Novinka	Novinka	Novinka	Novinka	Novinka	Novinka	Novinka	Novinka	Novinka	Novinka	Novinka	Novinka	Novinka	Novinka	Novinka	Novinka	Novinka	Novinka	Novinka	Novinka	Novinka	Novinka	Novinka	Novinka	Zapolarnaya	Zapolarnaya	Zapolarnaya	Zapolarnaya	Zapolarnaya	Zapolarnaya
SiO2	38.146	37.244	37.242	37.964	35.76	37.572	37.417	36.455	37.058	34.483	36.74	37.18	38.2	37.49	37.49	37.17	36.73	37	37.669	37.624	37.097	37.699	38.437	37.974	38.384	38.272	38.64	34.893	38.129	38.471	38.31	37.74	37.5	37.21	37.34	38.631	38.679	37.5	38.64	37.203	38.363	36.993	37.756	37.55	36.87	37.07	38.217	38.068	39.506
TiO2	0.12	0.12	0.12	0.12	0.284	0.119	0.12	0.207	0.12	0.556	0.28	0.21	0.15	0.14	0.27	0.3	0.28	0.33	0.108	0.123	0.122	0.123	0.123	0.123	0.123	0.123	0.122	0.696	0.171	0.123	0.22	0.17	0.19	0.23	0.45	0.1	0.101	0.15	0.14	0.142	0.072	0.122	0.124	0.21	0.31	0.21	0.095	0.021	0.082
Al2O3	0.042	0.042	0.042	0.042	0.4	0.042	0.044	0.606	0.389	0.601	1.21	1.1	1.22	1.22	1.37	1.52	1.94	1.18	0.45	0.043	0.354	0.044	0.044	0.044	0.043	0.043	0.398	4.795	1.132	0.044	0.98	0.97	0.96	0.95	0.86	0.035	0.08	0.89	0.93	0.035	0.041	0.044	0.044	0.76	1.13	1.01	0.008	0.006	0
Cr2O3	0.148	0.148	0.149	0.149	0.148	0.148	0.148	0.148	0.148	0.148	0	0	0.13	0	0.16	0	0.13	0.11	0.01	0.172	0.171	0.172	0.172	0.172	0.172	0.172	0.171	0.17	0.171	0.171	0	0.2	0.1	0	0	0.029	0.029	0.09	0.12	0.722	0.011	0.171	0.172	0.13	0.03	0.11	0	0	0.003
FeO	1.603	4.904	5.336	3.086	4.704	2.321	3.537	3.141	3.548	8.265	5.67	6.64	2.61	3.41	3.46	3.47	3.75	6.29	3.172	5.518	4.318	6.171	6.388	5.313	4.274	4.807	3.431	5.829	3.972	5.62	4.11	4.87	5.27	7.02	6.25	4.168	6.293	6.2	5.01	9.769	6.764	6.735	7.55	5.87	7.2	6.53	4.337	5.821	5.649
MnO	0.124	0.311	0.334	0.226	0.182	0.134	0.248	0.188	0.2	0.197	0.32	0.37	0.17	0.24	0.16	0.28	0.21	0.28	0.216	0.132	0.266	0.424	0.507	0.303	0.338	0.404	0.198	0.259	0.327	0.394	0.22	0.29	0.19	0.59	0.42	0.182	0.311	0.35	0.31	0.332	0.329	0.337	0.389	0.35	0.39	0.35	0.22	0.288	0.266
MgO	25.376	23.53	22.997	24.541	24.457	25.167	24.509	24.623	24.394	23.977	22.24	22.35	24.91	24.57	23.53	23.61	23.58	22.13	23.001	21.672	23.907	22.534	21.621	23.766	23.409	22.432	24.049	23.857	23.805	23.476	23.83	21.74	21.72	20.54	21.23	22.38	21.937	21.62	22.75	19.746	21.326	22.598	20.368	22.07	21.92	21.6	22.145	21.155	22.311
NiO	0.13	0.102	0.076	0.065	0.163	0.082	0.077	0.133	0.107	0.065									0.035	0.088	0.118	0.076	0.076	0.109	0.075	0.076	0.104	0.075	0.082	0.075						0.058	0.009			0	0	0.075	0.169				0	0.007	0
CaO	34.753	32.652	33.401	34.307	32.28	33.35	33.587	33.835	33.629	31.154	30.86	30.49	32.48	31.18	32.56	31.39	31.3	30.88	33.824	34.636	33.326	33.22	33.425	32.966	34.059	34.551	33.617	29.925	32.968	32.347	32.27	32.77	33.01	32.22	32.52	33.611	32.875	32.21	33.17	32.004	33.727	31.622	34.046	32.66	30.26	31.42	34.681	33.303	33.587
Total	100.009	98.743	99.386	100.124	98.229	98.625	99.419	99.187	99.325	99.234	97.32	98.34	99.87	98.25	99	97.74	97.92	98.2	98.485	99.671	99.386	100.049	100.377	100.43	100.465	100.467	100.438	100.254	100.586	100.307	99.94	98.75	98.94	98.76	99.07	99.194	100.314	99.01	101.07	99.953	100.633	98.285	100.278	99.6	98.11	98.3	99.703	98.669	101.404
No Oxyg	4	4	4	4	4	4	4	4	4	4	4	4	4	4	4	4	4	4	4	4	4	4	4	4	4	4	4	4	4	4	4	4	4	4	4	4	4	4	4	4	4	4	4	4	4	4	4	4	4
Si	0.995102	0.997	0.994518	0.995622	0.965887	0.995673	0.991057	0.970079	0.983123	0.936453	0.9979	1.00168	0.997416	0.996841	0.993193	0.994887	0.982977	0.998085	1.00653	1.00381	0.986091	1.00111	1.01675	0.999645	1.00653	1.00789	1.00784	0.916484	0.995589	1.01137	1.00548	1.00961	1.00392	1.00598	1.00276	1.02628	1.02364	1.00587	1.009	1.00745	1.01772	0.999848	1.00953	1.00126	0.998596	1.00195	1.01524	1.02532	1.0306
Ti	0.00235446	0.00241608	0.0024102	0.00236698	0.00576951	0.00237187	0.00239058	0.00414298	0.00239441	0.0113566	0.00572002	0.0042553	0.00294575	0.00279982	0.0053799	0.00603941	0.00563602	0.00669533	0.0021705	0.00246821	0.0024391	0.00245668	0.00244716	0.00243532	0.0024259	0.00243629	0.00239335	0.0137495	0.00335825	0.00243206	0.00434287	0.00342052	0.00382573	0.00467683	0.00908924	0.00199811	0.00201042	0.00302616	0.00274964	0.00289217	0.00143661	0.00248008	0.00249372	0.00421163	0.00631495	0.00426909	0.00189814	0.000425412	0.00160891
Al	0.00129121	0.00132501	0.00132178	0.00129808	0.0127327	0.00131169	0.00137345	0.0190043	0.012162	0.0192347	0.0387314	0.0349255	0.0375407	0.0382296	0.0427729	0.0479463	0.0611863	0.0375127	0.0141705	0.00135202	0.0110895	0.001377	0.00137167	0.00136503	0.00132884	0.00133454	0.012234	0.148424	0.0348338	0.0013632	0.0303123	0.0305811	0.0302879	0.0302681	0.0272177	0.00109579	0.00249513	0.0281338	0.0286199	0.00111697	0.00128183	0.00140151	0.00138649	0.0238827	0.0360683	0.0321718	0.000250457	0.00019045	0
Cr	0.00305228	0.00313217	0.00314565	0.00308925	0.00316035	0.00310069	0.00309911	0.00311356	0.00310408	0.00317751	0	0	0.0026835	0	0.00335107	0	0.00275049	0.00234587	0.000211246	0.00362793	0.00359351	0.00361098	0.00359699	0.00357959	0.00356573	0.00358102	0.00352611	0.00353005	0.00352993	0.00355401	0	0.00422986	0.00211648	0	0	0.000609076	0.000606759	0.00190852	0.00247732	0.015457	0.000230703	0.00365389	0.00363586	0.00274048	0.000642366	0.00235051	0	0	6.18718e-05
Fe(ii)	0.0349667	0.109772	0.119151	0.0676739	0.106243	0.0514317	0.0783372	0.069891	0.0787069	0.187684	0.128776	0.149586	0.0569845	0.0758172	0.0766474	0.0776629	0.0839183	0.14188	0.0708728	0.123103	0.0959763	0.137029	0.141297	0.116951	0.0937158	0.105855	0.0748305	0.128022	0.0867235	0.123543	0.0902002	0.108939	0.117973	0.158698	0.140348	0.092589	0.139263	0.13906	0.109395	0.221206	0.150045	0.152214	0.168804	0.130882	0.163062	0.147584	0.0963399	0.131099	0.123226
Mn	0.00273955	0.00705079	0.00755379	0.00501961	0.00416331	0.00300743	0.00556314	0.00423689	0.0044936	0.00453091	0.00736099	0.00844228	0.00375924	0.00540456	0.00358985	0.00634714	0.00475971	0.0063968	0.00488805	0.00298262	0.00598823	0.00953579	0.0113583	0.00675524	0.00750638	0.00901058	0.0043738	0.00576136	0.00723121	0.00877228	0.00489017	0.00657034	0.00430785	0.013509	0.00955238	0.00409486	0.00697064	0.00795088	0.00685577	0.00761414	0.0073918	0.00771406	0.0088089	0.00790398	0.00894582	0.00801181	0.00494966	0.00656947	0.00587689
MgO	0.986885	0.939043	0.915537	0.959488	0.98482	0.99428	0.967788	0.976823	0.964793	0.970735	0.900549	0.897681	0.969642	0.973958	0.929319	0.942111	0.940786	0.889963	0.916252	0.862004	0.947389	0.892104	0.85264	0.932697	0.91513	0.880695	0.93514	0.934173	0.926654	0.920082	0.93242	0.867033	0.866868	0.82786	0.849959	0.886367	0.865517	0.864548	0.88565	0.797165	0.843431	0.910561	0.811908	0.877336	0.885079	0.870367	0.877029	0.849448	0.867702
NiO	0.0027279	0.00219637	0.00163253	0.00137121	0.00354147	0.00174797	0.00164054	0.00284688	0.00228338	0.00141991	0	0	0	0	0	0	0	0	0.000752279	0.00188858	0.00252306	0.00162343	0.00161714	0.00230809	0.00158199	0.00160996	0.002182	0.00158458	0.00172229	0.00158601	0	0	0	0	0	0.00123944	0.000191595	0	0	0	0	0.00163058	0.00363486	0	0	0	0	0.000151658	0
CaO	0.971254	0.93642	0.955567	0.963889	0.93408	0.946826	0.953066	0.96458	0.955789	0.906393	0.897978	0.880033	0.908554	0.888195	0.924112	0.900107	0.897405	0.892411	0.968257	0.99	0.949038	0.945091	0.947237	0.929711	0.956817	0.9748	0.939367	0.84206	0.92223	0.911032	0.907368	0.939182	0.946751	0.933209	0.935612	0.956603	0.932097	0.925595	0.927947	0.928475	0.958551	0.915642	0.975262	0.93299	0.878026	0.909813	0.987023	0.960957	0.938685
TOTAL	3.00037	2.99836	3.00084	2.99982	3.0204	2.99975	3.00432	3.01472	3.00685	3.04098	2.97701	2.9766	2.97953	2.98124	2.97837	2.9751	2.97942	2.97529	2.98411	2.99123	3.00413	2.99394	2.97832	2.99545	2.9886	2.98721	2.98189	2.99379	2.98187	2.98374	2.97502	2.96956	2.97605	2.9742	2.97454	2.97087	2.9728	2.97609	2.9727	2.98137	2.98009	2.99514	2.98546	2.98121	2.97673	2.97652	2.98273	2.97416	2.96776
XFe mtc	0.0349667	0.109772	0.119151	0.0676739	0.106243	0.0514317	0.0783372	0.069891	0.0787069	0.187684	0.128776	0.149586	0.0569845	0.0758172	0.0766474	0.0776629	0.0839183	0.14188	0.0708728	0.123103	0.0959763	0.137029	0.141297	0.116951	0.0937158	0.105855	0.0748305	0.128022	0.0867235	0.123543	0.0902002	0.108939	0.117973	0.158698	0.140348	0.092589	0.139263	0.13906	0.109395	0.221206	0.150045	0.152214	0.168804	0.130882	0.163062	0.147584	0.0963399	0.131099	0.123226
Xfe liq	0.166608	0.166608	0.166608	0.166608	0.166608	0.166608	0.166608	0.166608	0.166608	0.166608	0.166608	0.166608	0.166608	0.166608	0.166608	0.166608	0.166608	0.166608	0.166608	0.146427	0.146427	0.146427	0.146427	0.146427	0.146427	0.146427	0.146427	0.146427	0.146427	0.146427	0.146427	0.146427	0.146427	0.163396	0.163396	0.163396	0.163396	0.163396	0.163396	0.163396	0.163396	0.163396	0.163396	0.154502	0.154502	0.154502	0.154502	0.154502	0.154502
NNO	1.8171	-3.41268	-4.34481	-0.480651	-3.11165	0.576563	-1.15363	-0.62046	-1.17714	#NUM!	-5.68569	#NUM!	0.205009	-0.99396	-1.04647	-1.11082	-1.51178	-11.7172	-0.682297	-9.46087	-3.36279	#NUM!	#NUM!	-6.57141	-3.14387	-4.49474	-1.5916	#NUM!	-2.52364	-9.89776	-2.82271	-4.94083	-6.8728	#NUM!	#NUM!	-2.21716	-11.9893	-11.5437	-3.57235	#NUM!	#NUM!	#NUM!	#NUM!	-10.5199	#NUM!	#NUM!	-2.92135	-10.8347	-6.52584
Xfe liq/XFe mtc	4.76476	1.51776	1.39829	2.46193	1.56818	3.23941	2.12681	2.38383	2.11682	0.887706	1.29379	1.1138	2.92375	2.1975	2.1737	2.14527	1.98536	1.17429	2.3508	1.18947	1.52566	1.06859	1.03631	1.25204	1.56246	1.38329	1.95679	1.14377	1.68844	1.18524	1.62336	1.34412	1.2412	1.0296	1.16422	1.76474	1.17329	1.175	1.49363	0.738657	1.08898	1.07346	0.967959	1.18047	0.947508	1.04687	1.60372	1.17852	1.25381
№	8D/257	8D/257	8D/257	8D/257	8D/257	8D/257	8D/257	8D/257	8D/257	8D/257	8D/257	8D/257	8D/257	8D/257	8D/257	8D/257	8D/257	8D/257	8D/257	415/19	415/19	415/19	415/19	415/19	415/19	415/19	415/19	415/19	415/19	415/19	415/19	415/19	415/19	409/145	409/145	409/145	409/145	409/145	409/145	409/145	409/145	409/145	409/145	122/352	122/352	122/352	122/352	122/352	122/352
Texture	CK	CK	CK	CK	CK	CK	CK	CK	CK	CK	CK	CK	CK	CK	CK	CK	CK	CK	CK	CK	CK	CK	CK	CK	CK	CK	CK	CK	CK	CK	CK	CK	CK	CK	CK	CK	CK	CK	CK	CK	CK	CK	CK	VK	VK	VK	VK	VK	VK
SiO2	27.81	27.81	27.81	27.81	27.81	27.81	27.81	27.81	27.81	27.81	27.81	27.81	27.81	27.81	27.81	27.81	27.81	27.81	27.81	30.08	30.08	30.08	30.08	30.08	30.08	30.08	30.08	30.08	30.08	30.08	30.08	30.08	30.08	30.54	30.54	30.54	30.54	30.54	30.54	30.54	30.54	30.54	30.54	26.66	26.66	26.66	26.66	26.66	26.66
TiO2	1.97	1.97	1.97	1.97	1.97	1.97	1.97	1.97	1.97	1.97	1.97	1.97	1.97	1.97	1.97	1.97	1.97	1.97	1.97	1.653	1.653	1.653	1.653	1.653	1.653	1.653	1.653	1.653	1.653	1.653	1.653	1.653	1.653	1.686	1.686	1.686	1.686	1.686	1.686	1.686	1.686	1.686	1.686	1.836	1.836	1.836	1.836	1.836	1.836
Al2O3	2.41	2.41	2.41	2.41	2.41	2.41	2.41	2.41	2.41	2.41	2.41	2.41	2.41	2.41	2.41	2.41	2.41	2.41	2.41	1.75	1.75	1.75	1.75	1.75	1.75	1.75	1.75	1.75	1.75	1.75	1.75	1.75	1.75	1.78	1.78	1.78	1.78	1.78	1.78	1.78	1.78	1.78	1.78	2.66	2.66	2.66	2.66	2.66	2.66
FeOtotal	11.9699	11.9699	11.9699	11.9699	11.9699	11.9699	11.9699	11.9699	11.9699	11.9699	11.9699	11.9699	11.9699	11.9699	11.9699	11.9699	11.9699	11.9699	11.9699	10.52	10.52	10.52	10.52	10.52	10.52	10.52	10.52	10.52	10.52	10.52	10.52	10.52	10.52	11.7391	11.7391	11.7391	11.7391	11.7391	11.7391	11.7391	11.7391	11.7391	11.7391	11.1001	11.1001	11.1001	11.1001	11.1001	11.1001
Fe2O3	10.68	10.68	10.68	10.68	10.68	10.68	10.68	10.68	10.68	10.68	10.68	10.68	10.68	10.68	10.68	10.68	10.68	10.68	10.68	10.08	10.08	10.08	10.08	10.08	10.08	10.08	10.08	10.08	10.08	10.08	10.08	10.08	10.08	9.69	9.69	9.69	9.69	9.69	9.69	9.69	9.69	9.69	9.69	9.38	9.38	9.38	9.38	9.38	9.38
FeO	2.36	2.36	2.36	2.36	2.36	2.36	2.36	2.36	2.36	2.36	2.36	2.36	2.36	2.36	2.36	2.36	2.36	2.36	2.36	1.45	1.45	1.45	1.45	1.45	1.45	1.45	1.45	1.45	1.45	1.45	1.45	1.45	1.45	3.02	3.02	3.02	3.02	3.02	3.02	3.02	3.02	3.02	3.02	2.66	2.66	2.66	2.66	2.66	2.66
MnO	0.191	0.191	0.191	0.191	0.191	0.191	0.191	0.191	0.191	0.191	0.191	0.191	0.191	0.191	0.191	0.191	0.191	0.191	0.191	0.155	0.155	0.155	0.155	0.155	0.155	0.155	0.155	0.155	0.155	0.155	0.155	0.155	0.155	0.151	0.151	0.151	0.151	0.151	0.151	0.151	0.151	0.151	0.151	0.167	0.167	0.167	0.167	0.167	0.167
MgO	30.898	30.898	30.898	30.898	30.898	30.898	30.898	30.898	30.898	30.898	30.898	30.898	30.898	30.898	30.898	30.898	30.898	30.898	30.898	33.787	33.787	33.787	33.787	33.787	33.787	33.787	33.787	33.787	33.787	33.787	33.787	33.787	33.787	34.037	34.037	34.037	34.037	34.037	34.037	34.037	34.037	34.037	34.037	28.446	28.446	28.446	28.446	28.446	28.446
CaO	13.293	13.293	13.293	13.293	13.293	13.293	13.293	13.293	13.293	13.293	13.293	13.293	13.293	13.293	13.293	13.293	13.293	13.293	13.293	7.963	7.963	7.963	7.963	7.963	7.963	7.963	7.963	7.963	7.963	7.963	7.963	7.963	7.963	6.832	6.832	6.832	6.832	6.832	6.832	6.832	6.832	6.832	6.832	14.877	14.877	14.877	14.877	14.877	14.877
Na2O	0.674	0.674	0.674	0.674	0.674	0.674	0.674	0.674	0.674	0.674	0.674	0.674	0.674	0.674	0.674	0.674	0.674	0.674	0.674	0.08088	0.08088	0.08088	0.08088	0.08088	0.08088	0.08088	0.08088	0.08088	0.08088	0.08088	0.08088	0.08088	0.08088	0.0674	0.0674	0.0674	0.0674	0.0674	0.0674	0.0674	0.0674	0.0674	0.0674	0.39092	0.39092	0.39092	0.39092	0.39092	0.39092
K2O	0.24	0.24	0.24	0.24	0.24	0.24	0.24	0.24	0.24	0.24	0.24	0.24	0.24	0.24	0.24	0.24	0.24	0.24	0.24	0.981	0.981	0.981	0.981	0.981	0.981	0.981	0.981	0.981	0.981	0.981	0.981	0.981	0.981	0.761	0.761	0.761	0.761	0.761	0.761	0.761	0.761	0.761	0.761	0.246	0.246	0.246	0.246	0.246	0.246
H2O	7.35	7.35	7.35	7.35	7.35	7.35	7.35	7.35	7.35	7.35	7.35	7.35	7.35	7.35	7.35	7.35	7.35	7.35	7.35	10.7	10.7	10.7	10.7	10.7	10.7	10.7	10.7	10.7	10.7	10.7	10.7	10.7	10.7	9.59	9.59	9.59	9.59	9.59	9.59	9.59	9.59	9.59	9.59	9.436	9.436	9.436	9.436	9.436	9.436
CO2	3.62	3.62	3.62	3.62	3.62	3.62	3.62	3.62	3.62	3.62	3.62	3.62	3.62	3.62	3.62	3.62	3.62	3.62	3.62	1.87	1.87	1.87	1.87	1.87	1.87	1.87	1.87	1.87	1.87	1.87	1.87	1.87	1.87	3.3	3.3	3.3	3.3	3.3	3.3	3.3	3.3	3.3	3.3	5.57	5.57	5.57	5.57	5.57	5.57
P2O5	0.349	0.349	0.349	0.349	0.349	0.349	0.349	0.349	0.349	0.349	0.349	0.349	0.349	0.349	0.349	0.349	0.349	0.349	0.349	0.411	0.411	0.411	0.411	0.411	0.411	0.411	0.411	0.411	0.411	0.411	0.411	0.411	0.411	0.639	0.639	0.639	0.639	0.639	0.639	0.639	0.639	0.639	0.639	0.118	0.118	0.118	0.118	0.118	0.118
S общ	0.16	0.16	0.16	0.16	0.16	0.16	0.16	0.16	0.16	0.16	0.16	0.16	0.16	0.16	0.16	0.16	0.16	0.16	0.16	0.22	0.22	0.22	0.22	0.22	0.22	0.22	0.22	0.22	0.22	0.22	0.22	0.22	0.22	0.14	0.14	0.14	0.14	0.14	0.14	0.14	0.14	0.14	0.14	0.12	0.12	0.12	0.12	0.12	0.12
F	0.26	0.26	0.26	0.26	0.26	0.26	0.26	0.26	0.26	0.26	0.26	0.26	0.26	0.26	0.26	0.26	0.26	0.26	0.26	0.14	0.14	0.14	0.14	0.14	0.14	0.14	0.14	0.14	0.14	0.14	0.14	0.14	0.14	0.25	0.25	0.25	0.25	0.25	0.25	0.25	0.25	0.25	0.25	0.134	0.134	0.134	0.134	0.134	0.134
Total	100.17	100.17	100.17	100.17	100.17	100.17	100.17	100.17	100.17	100.17	100.17	100.17	100.17	100.17	100.17	100.17	100.17	100.17	100.17	100.2	100.2	100.2	100.2	100.2	100.2	100.2	100.2	100.2	100.2	100.2	100.2	100.2	100.2	100.11	100.11	100.11	100.11	100.11	100.11	100.11	100.11	100.11	100.11	100.39	100.39	100.39	100.39	100.39	100.39
Ni	1000	1000	1000	1000	1000	1000	1000	1000	1000	1000	1000	1000	1000	1000	1000	1000	1000	1000	1000	1330	1330	1330	1330	1330	1330	1330	1330	1330	1330	1330	1330	1330	1330	1460	1460	1460	1460	1460	1460	1460	1460	1460	1460	960	960	960	960	960	960
Co	91	91	91	91	91	91	91	91	91	91	91	91	91	91	91	91	91	91	91	96	96	96	96	96	96	96	96	96	96	96	96	96	96	93	93	93	93	93	93	93	93	93	93	76	76	76	76	76	76
Cr	1205	1205	1205	1205	1205	1205	1205	1205	1205	1205	1205	1205	1205	1205	1205	1205	1205	1205	1205	1240	1240	1240	1240	1240	1240	1240	1240	1240	1240	1240	1240	1240	1240	1735	1735	1735	1735	1735	1735	1735	1735	1735	1735	1100	1100	1100	1100	1100	1100
V	70	70	70	70	70	70	70	70	70	70	70	70	70	70	70	70	70	70	70	90	90	90	90	90	90	90	90	90	90	90	90	90	90	125	125	125	125	125	125	125	125	125	125	90	90	90	90	90	90
Cu	20	20	20	20	20	20	20	20	20	20	20	20	20	20	20	20	20	20	20	37	37	37	37	37	37	37	37	37	37	37	37	37	37	40	40	40	40	40	40	40	40	40	40	14	14	14	14	14	14
Zn	76	76	76	76	76	76	76	76	76	76	76	76	76	76	76	76	76	76	76	69	69	69	69	69	69	69	69	69	69	69	69	69	69	65	65	65	65	65	65	65	65	65	65	72	72	72	72	72	72
Pb
Sr	944	944	944	944	944	944	944	944	944	944	944	944	944	944	944	944	944	944	944	438	438	438	438	438	438	438	438	438	438	438	438	438	438	1110	1110	1110	1110	1110	1110	1110	1110	1110	1110	974	974	974	974	974	974
Sr (РФА)
Zr	219	219	219	219	219	219	219	219	219	219	219	219	219	219	219	219	219	219	219	137	137	137	137	137	137	137	137	137	137	137	137	137	137	158	158	158	158	158	158	158	158	158	158	209	209	209	209	209	209
Ba
Ba+Ce																				990	990	990	990	990	990	990	990	990	990	990	990	990	990	4080	4080	4080	4080	4080	4080	4080	4080	4080	4080	360	360	360	360	360	360
Li	8	8	8	8	8	8	8	8	8	8	8	8	8	8	8	8	8	8	8	15	15	15	15	15	15	15	15	15	15	15	15	15	15	7	7	7	7	7	7	7	7	7	7	12	12	12	12	12	12
Rb	20	20	20	20	20	20	20	20	20	20	20	20	20	20	20	20	20	20	20	42	42	42	42	42	42	42	42	42	42	42	42	42	42	81	81	81	81	81	81	81	81	81	81	64	64	64	64	64	64
MgO#	70.3218	70.3218	70.3218	70.3218	70.3218	70.3218	70.3218	70.3218	70.3218	70.3218	70.3218	70.3218	70.3218	70.3218	70.3218	70.3218	70.3218	70.3218	70.3218	74.557	74.557	74.557	74.557	74.557	74.557	74.557	74.557	74.557	74.557	74.557	74.557	74.557	74.557	72.8111	72.8111	72.8111	72.8111	72.8111	72.8111	72.8111	72.8111	72.8111	72.8111	70.2613	70.2613	70.2613	70.2613	70.2613	70.2613
Y
Nb
Ni/Co	10.989	10.989	10.989	10.989	10.989	10.989	10.989	10.989	10.989	10.989	10.989	10.989	10.989	10.989	10.989	10.989	10.989	10.989	10.989	13.8542	13.8542	13.8542	13.8542	13.8542	13.8542	13.8542	13.8542	13.8542	13.8542	13.8542	13.8542	13.8542	13.8542	15.6989	15.6989	15.6989	15.6989	15.6989	15.6989	15.6989	15.6989	15.6989	15.6989	12.6316	12.6316	12.6316	12.6316	12.6316	12.6316
Cr/Ti	0.102034	0.102034	0.102034	0.102034	0.102034	0.102034	0.102034	0.102034	0.102034	0.102034	0.102034	0.102034	0.102034	0.102034	0.102034	0.102034	0.102034	0.102034	0.102034	0.125133	0.125133	0.125133	0.125133	0.125133	0.125133	0.125133	0.125133	0.125133	0.125133	0.125133	0.125133	0.125133	0.125133	0.171658	0.171658	0.171658	0.171658	0.171658	0.171658	0.171658	0.171658	0.171658	0.171658	0.0999406	0.0999406	0.0999406	0.0999406	0.0999406	0.0999406
Ti/Cr	9.8007	9.8007	9.8007	9.8007	9.8007	9.8007	9.8007	9.8007	9.8007	9.8007	9.8007	9.8007	9.8007	9.8007	9.8007	9.8007	9.8007	9.8007	9.8007	7.99151	7.99151	7.99151	7.99151	7.99151	7.99151	7.99151	7.99151	7.99151	7.99151	7.99151	7.99151	7.99151	7.99151	5.82554	5.82554	5.82554	5.82554	5.82554	5.82554	5.82554	5.82554	5.82554	5.82554	10.0059	10.0059	10.0059	10.0059	10.0059	10.0059
MgO/FeO	2.32323	2.32323	2.32323	2.32323	2.32323	2.32323	2.32323	2.32323	2.32323	2.32323	2.32323	2.32323	2.32323	2.32323	2.32323	2.32323	2.32323	2.32323	2.32323	2.89037	2.89037	2.89037	2.89037	2.89037	2.89037	2.89037	2.89037	2.89037	2.89037	2.89037	2.89037	2.89037	2.89037	2.60976	2.60976	2.60976	2.60976	2.60976	2.60976	2.60976	2.60976	2.60976	2.60976	2.30657	2.30657	2.30657	2.30657	2.30657	2.30657
MgO/TiO2	15.6843	15.6843	15.6843	15.6843	15.6843	15.6843	15.6843	15.6843	15.6843	15.6843	15.6843	15.6843	15.6843	15.6843	15.6843	15.6843	15.6843	15.6843	15.6843	20.4398	20.4398	20.4398	20.4398	20.4398	20.4398	20.4398	20.4398	20.4398	20.4398	20.4398	20.4398	20.4398	20.4398	20.188	20.188	20.188	20.188	20.188	20.188	20.188	20.188	20.188	20.188	15.4935	15.4935	15.4935	15.4935	15.4935	15.4935
SiO2/MgO	0.900058	0.900058	0.900058	0.900058	0.900058	0.900058	0.900058	0.900058	0.900058	0.900058	0.900058	0.900058	0.900058	0.900058	0.900058	0.900058	0.900058	0.900058	0.900058	0.890283	0.890283	0.890283	0.890283	0.890283	0.890283	0.890283	0.890283	0.890283	0.890283	0.890283	0.890283	0.890283	0.890283	0.897259	0.897259	0.897259	0.897259	0.897259	0.897259	0.897259	0.897259	0.897259	0.897259	0.937214	0.937214	0.937214	0.937214	0.937214	0.937214
K2O/Na2O	0.356083	0.356083	0.356083	0.356083	0.356083	0.356083	0.356083	0.356083	0.356083	0.356083	0.356083	0.356083	0.356083	0.356083	0.356083	0.356083	0.356083	0.356083	0.356083	12.1291	12.1291	12.1291	12.1291	12.1291	12.1291	12.1291	12.1291	12.1291	12.1291	12.1291	12.1291	12.1291	12.1291	11.2908	11.2908	11.2908	11.2908	11.2908	11.2908	11.2908	11.2908	11.2908	11.2908	0.629285	0.629285	0.629285	0.629285	0.629285	0.629285
Ni/V	14.2857	14.2857	14.2857	14.2857	14.2857	14.2857	14.2857	14.2857	14.2857	14.2857	14.2857	14.2857	14.2857	14.2857	14.2857	14.2857	14.2857	14.2857	14.2857	14.7778	14.7778	14.7778	14.7778	14.7778	14.7778	14.7778	14.7778	14.7778	14.7778	14.7778	14.7778	14.7778	14.7778	11.68	11.68	11.68	11.68	11.68	11.68	11.68	11.68	11.68	11.68	10.6667	10.6667	10.6667	10.6667	10.6667	10.6667
Cr/V	17.2143	17.2143	17.2143	17.2143	17.2143	17.2143	17.2143	17.2143	17.2143	17.2143	17.2143	17.2143	17.2143	17.2143	17.2143	17.2143	17.2143	17.2143	17.2143	13.7778	13.7778	13.7778	13.7778	13.7778	13.7778	13.7778	13.7778	13.7778	13.7778	13.7778	13.7778	13.7778	13.7778	13.88	13.88	13.88	13.88	13.88	13.88	13.88	13.88	13.88	13.88	12.2222	12.2222	12.2222	12.2222	12.2222	12.2222
K2O/Al2O3	0.0995851	0.0995851	0.0995851	0.0995851	0.0995851	0.0995851	0.0995851	0.0995851	0.0995851	0.0995851	0.0995851	0.0995851	0.0995851	0.0995851	0.0995851	0.0995851	0.0995851	0.0995851	0.0995851	0.560571	0.560571	0.560571	0.560571	0.560571	0.560571	0.560571	0.560571	0.560571	0.560571	0.560571	0.560571	0.560571	0.560571	0.427528	0.427528	0.427528	0.427528	0.427528	0.427528	0.427528	0.427528	0.427528	0.427528	0.0924812	0.0924812	0.0924812	0.0924812	0.0924812	0.0924812
Al2O3+Na2O+K2O	3.324	3.324	3.324	3.324	3.324	3.324	3.324	3.324	3.324	3.324	3.324	3.324	3.324	3.324	3.324	3.324	3.324	3.324	3.324	2.81188	2.81188	2.81188	2.81188	2.81188	2.81188	2.81188	2.81188	2.81188	2.81188	2.81188	2.81188	2.81188	2.81188	103.71	103.93	103.229	104.394	103.9	106	103.988	104.674	102.329	104.322	3.29692	3.29692	3.29692	3.29692	3.29692	3.29692
[truncated: 13 more columns]

## Sheet: Monticellite + correct NNO
Composition and fO2 (ΔNNO) for groundmass monticellite from the Upper Muna field, wt%.
№	Kos_M_04/3_7c mont	Kos_M_04/3_8c mont	Kos_M_04/3_9c mont	Kos_M_04/3_10c mont	Kos_M_04/3_10c mont	Kos_M_04/3_11c mont	Kos_M_04/3_12c mont	Kos_M_04/3_13c mont	m3-2c	m3-2b	M3-2	M3-mont2	m3-8b	8d/257im26-5	Kos_M_04_4_10 mont	Kos_M_04_4_14 mont	Kos_M_04_4_16 mont	Kos_M_04_4_17 mont	M4-4r	415/19im40-1	122/352im49-3	m9all-3
Sample	8d/257	8d/257	8d/257	8d/257	8d/257	8d/257	8d/257	8d/257	8d/257	8d/257	8d/257	8d/257	8d/257	8d/257	415/19	415/19	415/19	415/19	415/19	415/19	122/352	02-144
Pipe	Deimos	Deimos	Deimos	Deimos	Deimos	Deimos	Deimos	Deimos	Deimos	Deimos	Deimos	Deimos	Deimos	Deimos	Novinka	Novinka	Novinka	Novinka	Novinka	Novinka	Zapolarnaya	Zimnaya
SiO2	38.146	37.244	37.964	35.76	37.572	37.417	36.455	37.058	38.2	37.49	37.49	37.17	36.73	37.669	37.097	38.384	38.64	38.129	38.31	38.631	38.217	39.02
TiO2	0.12	0.12	0.12	0.284	0.119	0.12	0.207	0.12	0.15	0.14	0.27	0.3	0.28	0.108	0.122	0.123	0.122	0.171	0.22	0.1	0.095	0.1
Al2O3	0.042	0.042	0.042	0.4	0.042	0.044	0.606	0.389	1.22	1.22	1.37	1.52	1.94	0.45	0.354	0.043	0.398	1.132	0.98	0.035	0.008	0.89
Cr2O3	0.148	0.148	0.149	0.148	0.148	0.148	0.148	0.148	0.13	0	0.16	0	0.13	0.01	0.171	0.172	0.171	0.171	0	0.029	0	0.16
FeO	1.603	4.904	3.086	4.704	2.321	3.537	3.141	3.548	2.61	3.41	3.46	3.47	3.75	3.172	4.318	4.274	3.431	3.972	4.11	4.168	4.337	3.97
MnO	0.124	0.311	0.226	0.182	0.134	0.248	0.188	0.2	0.17	0.24	0.16	0.28	0.21	0.216	0.266	0.338	0.198	0.327	0.22	0.182	0.22	0.18
MgO	25.376	23.53	24.541	24.457	25.167	24.509	24.623	24.394	24.91	24.57	23.53	23.61	23.58	23.001	23.907	23.409	24.049	23.805	23.83	22.38	22.145	24.07
NiO	0.13	0.102	0.065	0.163	0.082	0.077	0.133	0.107						0.035	0.118	0.075	0.104	0.082		0.058	0
CaO	34.753	32.652	34.307	32.28	33.35	33.587	33.835	33.629	32.48	31.18	32.56	31.39	31.3	33.824	33.326	34.059	33.617	32.968	32.27	33.611	34.681	33.22
Total	100.009	98.743	100.124	98.229	98.625	99.419	99.187	99.325	99.87	98.25	99	97.74	97.92	98.485	99.386	100.465	100.438	100.586	99.94	99.194	99.703	101.61
No Oxyg	4	4	4	4	4	4	4	4	4	4	4	4	4	4	4	4	4	4	4	4	4
Si	0.995102	0.997	0.995622	0.965887	0.995673	0.991057	0.970079	0.983123	0.997416	0.996841	0.993193	0.994887	0.982977	1.00653	0.986091	1.00653	1.00784	0.995589	1.00548	1.02628	1.01524	1.00762
Ti	0.00235446	0.00241608	0.00236698	0.00576951	0.00237187	0.00239058	0.00414298	0.00239441	0.00294575	0.00279982	0.0053799	0.00603941	0.00563602	0.0021705	0.0024391	0.0024259	0.00239335	0.00335825	0.00434287	0.00199811	0.00189814	0.00194224
Al	0.00129121	0.00132501	0.00129808	0.0127327	0.00131169	0.00137345	0.0190043	0.012162	0.0375407	0.0382296	0.0427729	0.0479463	0.0611863	0.0141705	0.0110895	0.00132884	0.012234	0.0348338	0.0303123	0.00109579	0.000250457	0.0270852
Cr	0.00305228	0.00313217	0.00308925	0.00316035	0.00310069	0.00309911	0.00311356	0.00310408	0.0026835	0	0.00335107	0	0.00275049	0.000211246	0.00359351	0.00356573	0.00352611	0.00352993	0	0.000609076	0	0.00326645
Fe(ii)	0.0349667	0.109772	0.0676739	0.106243	0.0514317	0.0783372	0.069891	0.0787069	0.0569845	0.0758172	0.0766474	0.0776629	0.0839183	0.0708728	0.0959763	0.0937158	0.0748305	0.0867235	0.0902002	0.092589	0.0963399	0.0857245
Mn	0.00273955	0.00705079	0.00501961	0.00416331	0.00300743	0.00556314	0.00423689	0.0044936	0.00375924	0.00540456	0.00358985	0.00634714	0.00475971	0.00488805	0.00598823	0.00750638	0.0043738	0.00723121	0.00489017	0.00409486	0.00494966	0.00393661
Mg	0.986885	0.939043	0.959488	0.98482	0.99428	0.967788	0.976823	0.964793	0.969642	0.973958	0.929319	0.942111	0.940786	0.916252	0.947389	0.91513	0.93514	0.926654	0.93242	0.886367	0.877029	0.926642
Ni	0.0027279	0.00219637	0.00137121	0.00354147	0.00174797	0.00164054	0.00284688	0.00228338	0	0	0	0	0	0.000752279	0.00252306	0.00158199	0.002182	0.00172229	0	0.00123944	0	0
Ca	1.94251	1.87284	1.92778	1.86816	1.89365	1.90613	1.92916	1.91158	1.81711	1.77639	1.84822	1.80021	1.79481	1.93651	1.89808	1.91363	1.87873	1.84446	1.81474	1.91321	1.97405	1.83807
TOTAL	0	0	0	0	0	0	0	0	0	0	0	0	0		0	0	0	0	0			0
XFe mtc	0.0349667	0.109772	0.0676739	0.106243	0.0514317	0.0783372	0.069891	0.0787069	0.0569845	0.0758172	0.0766474	0.0776629	0.0839183	0.0708728	0.0959763	0.0937158	0.0748305	0.0867235	0.0902002	0.092589	0.0963399	0.0857245
Xfe liq	0.166608	0.166608	0.166608	0.166608	0.166608	0.166608	0.166608	0.166608	0.166608	0.166608	0.166608	0.166608	0.166608	0.166608	0.146427	0.146427	0.146427	0.146427	0.146427	0.163396	0.154502	0.139581
NNO	1.8171	-3.41268	-0.480651	-3.11165	0.576563	-1.15363	-0.62046	-1.17714	0.205009	-0.99396	-1.04647	-1.11082	-1.51178	-0.682297	-3.36279	-3.14387	-1.5916	-2.52364	-2.82271	-2.21716	-2.92135	-2.79881
Pipe	3.08817	0.30224	1.11233	0.345502	1.77941	0.824801	1.04532	0.81623	1.50857	0.885453	0.865031	0.840644	0.70344	1.01699	0.309017	0.340592	0.678924	0.44868	0.392842	0.514148	0.375993	0.397035
№	8D/257	8D/257	8D/257	8D/257	8D/257	8D/257	8D/257	8D/257	8D/257	8D/257	8D/257	8D/257	8D/257	8D/257	415/19	415/19	415/19	415/19	415/19	409/145	122/352	02/144
Texture	CK	CK	CK	CK	CK	CK	CK	CK	CK	CK	CK	CK	CK	CK	CK	CK	CK	CK	CK	CK	VK	CK
SiO2	27.81	27.81	27.81	27.81	27.81	27.81	27.81	27.81	27.81	27.81	27.81	27.81	27.81	27.81	30.08	30.08	30.08	30.08	30.08	30.54	26.66	30.25
TiO2	1.97	1.97	1.97	1.97	1.97	1.97	1.97	1.97	1.97	1.97	1.97	1.97	1.97	1.97	1.653	1.653	1.653	1.653	1.653	1.686	1.836	1.717
Al2O3	2.41	2.41	2.41	2.41	2.41	2.41	2.41	2.41	2.41	2.41	2.41	2.41	2.41	2.41	1.75	1.75	1.75	1.75	1.75	1.78	2.66	2.25
FeOtotal	11.9699	11.9699	11.9699	11.9699	11.9699	11.9699	11.9699	11.9699	11.9699	11.9699	11.9699	11.9699	11.9699	11.9699	10.52	10.52	10.52	10.52	10.52	11.7391	11.1001	10.0281
Fe2O3	10.68	10.68	10.68	10.68	10.68	10.68	10.68	10.68	10.68	10.68	10.68	10.68	10.68	10.68	10.08	10.08	10.08	10.08	10.08	9.69	9.38	9.6
FeO	2.36	2.36	2.36	2.36	2.36	2.36	2.36	2.36	2.36	2.36	2.36	2.36	2.36	2.36	1.45	1.45	1.45	1.45	1.45	3.02	2.66	1.39
MnO	0.191	0.191	0.191	0.191	0.191	0.191	0.191	0.191	0.191	0.191	0.191	0.191	0.191	0.191	0.155	0.155	0.155	0.155	0.155	0.151	0.167	0.161
MgO	30.898	30.898	30.898	30.898	30.898	30.898	30.898	30.898	30.898	30.898	30.898	30.898	30.898	30.898	33.787	33.787	33.787	33.787	33.787	34.037	28.446	31.943
CaO	13.293	13.293	13.293	13.293	13.293	13.293	13.293	13.293	13.293	13.293	13.293	13.293	13.293	13.293	7.963	7.963	7.963	7.963	7.963	6.832	14.877	7.311
Na2O	0.674	0.674	0.674	0.674	0.674	0.674	0.674	0.674	0.674	0.674	0.674	0.674	0.674	0.674	0.08088	0.08088	0.08088	0.08088	0.08088	0.0674	0.39092	0.40434
K2O	0.24	0.24	0.24	0.24	0.24	0.24	0.24	0.24	0.24	0.24	0.24	0.24	0.24	0.24	0.981	0.981	0.981	0.981	0.981	0.761	0.246	0.505932
H2O	7.35	7.35	7.35	7.35	7.35	7.35	7.35	7.35	7.35	7.35	7.35	7.35	7.35	7.35	10.7	10.7	10.7	10.7	10.7	9.59	9.436	11.02
CO2	3.62	3.62	3.62	3.62	3.62	3.62	3.62	3.62	3.62	3.62	3.62	3.62	3.62	3.62	1.87	1.87	1.87	1.87	1.87	3.3	5.57	4.27
P2O5	0.349	0.349	0.349	0.349	0.349	0.349	0.349	0.349	0.349	0.349	0.349	0.349	0.349	0.349	0.411	0.411	0.411	0.411	0.411	0.639	0.118	0.337
S общ	0.16	0.16	0.16	0.16	0.16	0.16	0.16	0.16	0.16	0.16	0.16	0.16	0.16	0.16	0.22	0.22	0.22	0.22	0.22	0.14	0.12	0.17
F	0.26	0.26	0.26	0.26	0.26	0.26	0.26	0.26	0.26	0.26	0.26	0.26	0.26	0.26	0.14	0.14	0.14	0.14	0.14	0.25	0.134	0.18
Total	100.17	100.17	100.17	100.17	100.17	100.17	100.17	100.17	100.17	100.17	100.17	100.17	100.17	100.17	100.2	100.2	100.2	100.2	100.2	100.11	100.39	101.319
Ni	1000	1000	1000	1000	1000	1000	1000	1000	1000	1000	1000	1000	1000	1000	1330	1330	1330	1330	1330	1460	960	1100
Co	91	91	91	91	91	91	91	91	91	91	91	91	91	91	96	96	96	96	96	93	76	100
Cr	1205	1205	1205	1205	1205	1205	1205	1205	1205	1205	1205	1205	1205	1205	1240	1240	1240	1240	1240	1735	1100	1100
V	70	70	70	70	70	70	70	70	70	70	70	70	70	70	90	90	90	90	90	125	90	70
Cu	20	20	20	20	20	20	20	20	20	20	20	20	20	20	37	37	37	37	37	40	14	43
Zn	76	76	76	76	76	76	76	76	76	76	76	76	76	76	69	69	69	69	69	65	72	99
Pb
Sr	944	944	944	944	944	944	944	944	944	944	944	944	944	944	438	438	438	438	438	1110	974	802
Sr (РФА)
Zr	219	219	219	219	219	219	219	219	219	219	219	219	219	219	137	137	137	137	137	158	209	185
Ba
Ba+Ce															990	990	990	990	990	4080	360	310
Li	8	8	8	8	8	8	8	8	8	8	8	8	8	8	15	15	15	15	15	7	12	6
Rb	20	20	20	20	20	20	20	20	20	20	20	20	20	20	42	42	42	42	42	81	64	36

## Sheet: Apatite
Composition of groundmass apatite from the Upper Muna field. wt%.
№	8d/257im24-4	8d/257im26-4	415/19im37-5	415/19im40-3	122/352im49-5	1	2	3	4	5	6	9	7	8
Pipe	Deimos	Deimos	Novinka	Novinka	Zapolyarnaya	Novinka	Novinka	Novinka	Novinka	Novinka	Novinka	Novinka	Komsomolskaya-M	Deimos
SiO2	0.449	0.54	1.376	0.97	0.452
TiO2	0.022	0.031	0.005	0.026	0.012
Al2O3	0	0.006	0.002	0.028	0
FeO	0.336	0.371	0.081	0.356	0.181	0.062	0.052	0.105	0.1445	0.123	0.12	0.117	0.369	0.737
MnO	0	0	0	0.026	0.012	0.202	0.181	0.095	0.129	0.185	0.2	0.085	0.323	0.085
MgO	0.023	0.052	0.07	0.081	0.015
CaO	54.071	53.02	53.561	53.649	53.639	55.198	54.717	54.057	54.79	54.532	54.744	52.715	52.997	52.242
K2O	0	0.008	0.005	0.006	0.006
P2O5	41.113	38.436	40.893	40.716	41.693	40.635	39.98	39.614	39.341	39.676	39.315	40.82	38.895	39.225
F	3.12	0.969	3.368	3.721	4.077	-	-	-	-	-	-	-	-	-
SrO	1.269	0	2.214	1.936	1.484	1.925	2.026	1.618	1.658	1.891	1.902	1.822	2.036	2.096
BaO	0	0	0.039	0.028	0
La2O3	0	0.039	0	0	0
ThO2	0	0.01	0	0	0
Total	100.403	93.482	101.614	101.543	101.571	98.022	96.956	95.489	96.0625	96.407	96.281	95.559	94.62	94.385

## Sheet: Carbonate
Composition of groundmass carbonate from the Upper Muna field. wt%.
№	302/24im8-3	328/6im11-3	328/6im11-4 смесь	8d/257im26-6	8d/119im34-1	8d/119im34-2	409/145im43-8	02/100im55-1	1	2	5	6	9	10	13	14	15	16
Comment	Komsomolskaya-M	Komsomolskaya-M	Komsomolskaya-M	Deimos	Deimos	Deimos	Novinka	Poiskovaya	Komsomolskaya-M	Komsomolskaya-M	Deimos	Deimos	Deimos	Deimos	Novinka	Novinka	Poiskovaya	Poiskovaya
SiO2	0.096	0.109	12.671	0.022	0.014	0	0.062	0.017	0.028	0.028	0.029	0.028	0.029	0.029	0.028	0.029	0.029	0.029
TiO2	0.001	0.026	0.342	0.053	0.033	0.009	0.016	0	0.059	0.059	0.059	0.059	0.059	0.059	0.059	0.1	0.059	0.059
Al2O3	0.042	0.027	0.321	0.002	0.041	0.013	0.001	0.024
FeO	0.188	0.054	1.53	0.24	0.081	0.082	0.061	0.149	0.252	0.133	0.205	0.148	0.61	0.483	0.178	0.178	0.314	0.197
MnO	0	0.014	0.154	0.011	0.016	0.028	0.007	0
MgO	0.028	0.164	11.815	0.048	0.16	0.152	0.079	0.027	0.204	0.11	0.209	0.199	0.307	0.103	0.326	0.326	0.21	0.147
CaO	57.183	62.524	40.39	61.895	63.098	61.952	62.242	62.41	55.668	54.708	55.118	53.908	55.435	55.209	55.791	54.791	55.191	55.119
K2O	0.015	0.03	0.051	0	0	0.02	0.018	0
P2O5	0.042	0.007	0.023	0.007	0.03	0.017	0.186	0.021	0.068	0.068	0.069	0.068	0.068	0.068	0.068	0.068	0.069	0.068
F	0.078	0	0.014	0.128	0	0	0.016	0.109
SrO	0.035	0	0	0	0	0	0	0	0.043	0.192	0.562	0.555	0.075	0.131	0.044	0.044	0.989	0.413
BaO									0	0.062	0		0.09	0	0.012	0	0.101
Nd2O3	0	0.585	0	0.53	0	1.366	0	0
Nb2O5	0	0.016	0	0	0.016	0	0	0	0.088	0.087	0.089	0.088	0.088	0.089	0.087	0.148	0.093	0.088
Ta2O5	0	0.02	0	0.028	0	0	0.042	0
La2O3	0	0.036	0.003	0	0	0.03	0.011	0	0.15	0.148	0.15	0.149	0.15	0.15	0.151	0.151	0.15	0.15
ThO2	0	0	0.031	0	0.006	0.088	0.035	0
Ce2O3	0	0.032	0.012	0	0	0	0	0	0.157	0.155	0.157	0.156	0.158	0.158	0.158	0.158	0.158	0.157
Total	57.708	63.706	67.357	63.065	63.585	63.757	62.788	62.757	56.929	55.897	56.859	55.569	57.191	56.691	57.103	56.206	57.475	56.638
